# Supplementary material
Source: Springer Nature journal article supplement (https://www.springermedizin.de/resource/supplementary/12967_2014_2111_MOESM3_ESM.pdf/9575048)

**IL-2→p-Stat5**

**CD45RA+ Th cells**

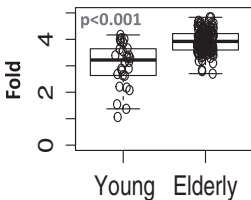

**IFN- $\alpha$ →p-Stat5**

**CD45RA+ cytotoxic T cells**

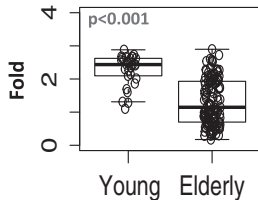

**IL-27→p-Stat5**

**CD45RA+ cytotoxic T cells**

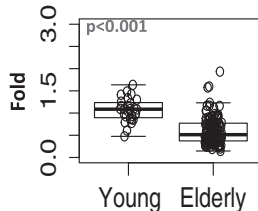

**IFN- $\alpha$ →p-Stat1**

**CD45RA+ cytotoxic T cells**

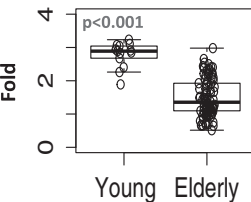

**IL-6→p-Stat1**

**CD45RA+ cytotoxic T cells**

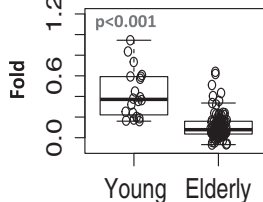

**IL-4→p-Stat6**

**CD45RA+ cytotoxic T cells**

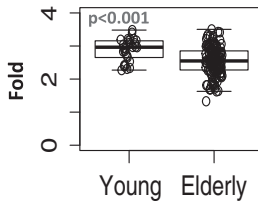

**IL-6→p-Stat3**

**CD45RA+ cytotoxic T cells**

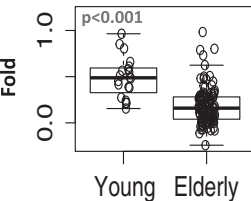

**IFN- $\alpha$ →p-Stat5**

**CD45RA+ Th cells**

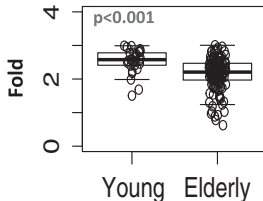

**IL-27→p-Stat1**

**CD45RA+ cytotoxic T cells**

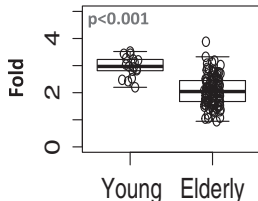

Supplement: MOESM3 [file 9575048]
